# Supplementary material
Source: ML conference proceedings conference paper supplement (https://openaccess.thecvf.com/content/CVPR2023/html/Choi_Balanced_Energy_Regularization_CVPR_2023_paper.html)
Supplement: Supplementary file 1 [file ____CVPR2023___Energy_Balanced_OOD_SUPP.pdf › ____CVPR2023___Energy_Balanced_OOD_SUPP.pdf]

## Supplementary Material

### S.1. Limitations

Although our method is a simple and competitive approach to various OOD detection tasks, additional auxiliary data is still required. OOD detection without additional data would be an ideal model. However, approaches that use auxiliary data still show superior performance to the approaches without using auxiliary data. Instead, we can consider a way to utilize a small amount of auxiliary data as little as possible with competitive performance in future work.

### S.2. Potential Negative Societal Impacts

OOD detection is a branch of anomaly detection. In vision tasks, anomaly detection typically plays a positive role in strengthening security in surveillance systems. However, indiscriminate abuse of automated surveillance systems can increase the surveillance of workers. Therefore, when our method is applied to a real environment, we ensure ours to be used only for the purpose of enhancing human safety without infringing on human privacy.

### S.3. Details on the setting of hyperparameter $\alpha$

As discussed in Section 3.2, we set the adaptive loss margin as  $\alpha \cdot Z_\gamma$ . More specifically, to standardize  $\alpha$ , we redesign  $\alpha$  as a relative offset from the baseline which the case of  $\gamma=0$ . Thus, we set  $\alpha \approx \beta \cdot K \cdot (m_{out} - m_{in})$ , where  $\beta$  is proportionality constant,  $K$  is a number of classes and  $m_{out} - m_{in}$  is energy distance between in-distribution and OOD, respectively. When  $\gamma=0$ , adaptive loss margin  $\alpha \cdot Z_\gamma$  become  $\beta \cdot (m_{out} - m_{in})$ , which is the relative offset proportional to  $\beta$ . As  $\beta$  increases, the sensitivity to  $\gamma$  increases, and even a small change in  $\gamma$  greatly changes the adaptive loss margin. Conversely, if we set  $\beta \approx 0$ , the sensitivity to  $\gamma$  becomes small, and even if  $\gamma$  increases, the adaptive margin approaches 0 regardless of this, so there is no difference from the original energy regularization loss  $L_{out,hinge}$ . Finally, we choose to use the appropriate  $\beta = 0.05$  with corresponding  $\alpha$  and adjust the hyperparameter  $\gamma$ . As seen in Table S.1 and Table S.2, AUROC and accuracy also show similar tendencies as discussed above.

Table S.1. Average AUROC (over 6 datasets) on CIFAR10-LT using ResNet18 depending on hyperparameter  $\gamma$  and  $\alpha$

| Hyperparameter $\gamma$ | Average AUROC           |       |       |              |       |       |       |
|-------------------------|-------------------------|-------|-------|--------------|-------|-------|-------|
|                         | Hyperparameter $\beta$  |       |       |              |       |       |       |
|                         | 0.0025                  | 0.01  | 0.025 | 0.05         | 0.1   | 0.25  | 0.5   |
|                         | Hyperparameter $\alpha$ |       |       |              |       |       |       |
|                         | 0.5                     | 2     | 5     | 10           | 20    | 50    | 100   |
| 0.1                     | 91.92                   | 91.93 | 91.98 | 92.01        | 92.12 | 92.02 | 91.52 |
| 0.25                    | 91.96                   | 92.00 | 92.07 | 92.16        | 92.28 | 92.42 | 91.69 |
| 0.5                     | 92.17                   | 92.20 | 92.29 | 92.44        | 92.55 | 92.11 | 91.85 |
| 0.75                    | 92.34                   | 92.39 | 92.48 | <b>92.56</b> | 92.50 | 92.00 | 91.82 |
| 1                       | 92.41                   | 92.47 | 92.52 | 92.45        | 92.44 | 91.91 | 91.79 |
| 1.25                    | 92.39                   | 92.41 | 92.37 | 92.33        | 92.27 | 91.94 | 91.61 |

Table S.2. Accuracy on CIFAR10-LT using ResNet18 depending on hyperparameter  $\gamma$  and  $\alpha$

| Hyperparameter $\gamma$ | Accuracy(ACC)           |       |       |       |              |       |       |
|-------------------------|-------------------------|-------|-------|-------|--------------|-------|-------|
|                         | Hyperparameter $\beta$  |       |       |       |              |       |       |
|                         | 0.0025                  | 0.01  | 0.025 | 0.05  | 0.1          | 0.25  | 0.5   |
|                         | Hyperparameter $\alpha$ |       |       |       |              |       |       |
|                         | 0.5                     | 2     | 5     | 10    | 20           | 50    | 100   |
| 0.1                     | 74.53                   | 74.60 | 74.84 | 75.03 | 75.45        | 73.71 | 70.18 |
| 0.25                    | 74.57                   | 74.64 | 74.86 | 75.23 | 75.95        | 76.13 | 63.15 |
| 0.5                     | 75.15                   | 75.23 | 75.61 | 75.92 | <b>76.60</b> | 68.03 | 59.78 |
| 0.75                    | 75.88                   | 75.87 | 76.29 | 76.22 | 74.87        | 65.64 | 56.92 |
| 1                       | 76.15                   | 75.92 | 75.98 | 74.85 | 72.40        | 62.86 | 54.66 |
| 1.25                    | 75.94                   | 75.66 | 74.61 | 72.38 | 69.96        | 60.85 | 52.43 |

## S.4. OOD prior probability for all tasks

### S.4.1 Semantic Segmentation

Table S.3. OOD prior probability in semantic segmentation task: cut-pasted OOD pixel inference result collected from 10000 synthesized scene images

|             |          |          |          |          |          |          |               |              |            |          |
|-------------|----------|----------|----------|----------|----------|----------|---------------|--------------|------------|----------|
| class index | 0        | 1        | 2        | 3        | 4        | 5        | 6             | 7            | 8          | 9        |
| class name  | road     | sidewalk | building | wall     | fence    | pole     | traffic light | traffic sign | vegetation | terrain  |
| probability | 1.53E-01 | 1.33E-02 | 1.07E-01 | 4.01E-02 | 3.39E-02 | 5.26E-03 | 1.06E-03      | 2.80E-02     | 8.02E-02   | 9.80E-02 |
| class index | 10       | 11       | 12       | 13       | 14       | 15       | 16            | 17           | 18         |          |
| class name  | sky      | person   | rider    | car      | truck    | bus      | train         | motorcycle   | bicycle    |          |
| probability | 2.17E-03 | 1.53E-01 | 2.92E-02 | 8.71E-02 | 1.20E-01 | 1.60E-02 | 7.07E-03      | 1.70E-02     | 9.39E-03   |          |

### S.4.2 Long-tailed Image Classification

Table S.4. OOD prior probability in long-tailed image classification task: TinyImages 300K inference result on CIFAR10-LT model using ResNet18 :

|             |          |            |          |          |          |          |          |          |          |          |
|-------------|----------|------------|----------|----------|----------|----------|----------|----------|----------|----------|
| class index | 0        | 1          | 2        | 3        | 4        | 5        | 6        | 7        | 8        | 9        |
| class name  | airplane | automobile | bird     | cat      | deer     | dog      | frog     | horse    | ship     | truck    |
| probability | 2.50E-01 | 7.96E-02   | 1.63E-01 | 2.49E-01 | 6.15E-02 | 8.50E-02 | 3.05E-02 | 2.32E-02 | 2.39E-02 | 3.45E-02 |

Table S.5. OOD prior probability in long-tailed image classification task: TinyImages 300K inference result on CIFAR100-LT model using ResNet18

|             |          |               |           |              |           |          |             |            |              |           |
|-------------|----------|---------------|-----------|--------------|-----------|----------|-------------|------------|--------------|-----------|
| class index | 0        | 1             | 2         | 3            | 4         | 5        | 6           | 7          | 8            | 9         |
| class name  | apple    | aquarium.fish | baby      | bear         | beaver    | bed      | bee         | beetle     | bicycle      | bottle    |
| probability | 7.58E-03 | 1.69E-02      | 6.16E-02  | 2.54E-02     | 1.78E-02  | 3.67E-02 | 2.81E-02    | 1.02E-02   | 1.87E-02     | 3.70E-02  |
| class index | 10       | 11            | 12        | 13           | 14        | 15       | 16          | 17         | 18           | 19        |
| class name  | bowl     | boy           | bridge    | bus          | butterfly | camel    | can         | castle     | caterpillar  | cattle    |
| probability | 2.98E-02 | 6.17E-02      | 3.48E-02  | 4.20E-02     | 1.69E-02  | 1.61E-02 | 6.56E-02    | 2.40E-02   | 2.52E-02     | 1.70E-02  |
| class index | 20       | 21            | 22        | 23           | 24        | 25       | 26          | 27         | 28           | 29        |
| class name  | chair    | chimpanzee    | clock     | cloud        | cockroach | couch    | crab        | crocodile  | cup          | dinosaur  |
| probability | 7.81E-03 | 7.30E-03      | 2.55E-02  | 1.84E-02     | 3.27E-03  | 2.78E-02 | 9.09E-03    | 1.17E-02   | 7.72E-03     | 9.21E-03  |
| class index | 30       | 31            | 32        | 33           | 34        | 35       | 36          | 37         | 38           | 39        |
| class name  | dolphin  | elephant      | flatfish  | forest       | fox       | girl     | hamster     | house      | kangaroo     | keyboard  |
| probability | 8.08E-03 | 7.00E-03      | 9.30E-03  | 2.38E-02     | 3.79E-03  | 1.99E-02 | 4.01E-03    | 1.64E-02   | 6.19E-03     | 1.74E-02  |
| class index | 40       | 41            | 42        | 43           | 44        | 45       | 46          | 47         | 48           | 49        |
| class name  | lamp     | lawn.mower    | leopard   | lion         | lizard    | lobster  | man         | maple.tree | motorcycle   | mountain  |
| probability | 1.59E-02 | 6.44E-03      | 7.91E-03  | 2.53E-03     | 6.93E-03  | 7.94E-03 | 1.97E-02    | 4.40E-03   | 3.35E-03     | 8.74E-03  |
| class index | 50       | 51            | 52        | 53           | 54        | 55       | 56          | 57         | 58           | 59        |
| class name  | mouse    | mushroom      | oak.tree  | orange       | orchid    | otter    | palm.tree   | pear       | pickup.truck | pine.tree |
| probability | 2.52E-03 | 4.93E-03      | 1.88E-03  | 2.78E-03     | 5.78E-03  | 1.05E-03 | 2.04E-03    | 1.31E-03   | 2.52E-03     | 2.38E-03  |
| class index | 60       | 61            | 62        | 63           | 64        | 65       | 66          | 67         | 68           | 69        |
| class name  | plain    | plate         | poppy     | porcupine    | possum    | rabbit   | raccoon     | ray        | road         | rocket    |
| probability | 1.14E-02 | 1.46E-02      | 3.08E-03  | 1.42E-03     | 4.73E-03  | 7.11E-03 | 3.10E-03    | 5.36E-03   | 4.87E-03     | 9.77E-03  |
| class index | 70       | 71            | 72        | 73           | 74        | 75       | 76          | 77         | 78           | 79        |
| class name  | rose     | sea           | seal      | shark        | shrew     | skunk    | skyscraper  | snail      | snake        | spider    |
| probability | 1.94E-03 | 3.22E-03      | 4.47E-04  | 9.43E-04     | 2.63E-04  | 3.23E-04 | 2.14E-03    | 1.33E-04   | 1.59E-03     | 8.27E-04  |
| class index | 80       | 81            | 82        | 83           | 84        | 85       | 86          | 87         | 88           | 89        |
| class name  | squirrel | streetcar     | sunflower | sweet.pepper | table     | tank     | telephone   | television | tiger        | tractor   |
| probability | 2.10E-04 | 1.89E-03      | 1.05E-03  | 4.87E-04     | 1.35E-03  | 3.57E-04 | 1.10E-03    | 3.32E-03   | 4.07E-04     | 2.84E-03  |
| class index | 90       | 91            | 92        | 93           | 94        | 95       | 96          | 97         | 98           | 99        |
| class name  | train    | trout         | tulip     | turtle       | wardrobe  | whale    | willow.tree | wolf       | woman        | worm      |
| probability | 7.27E-04 | 7.00E-05      | 9.33E-05  | 2.00E-05     | 2.87E-03  | 1.60E-04 | 2.43E-04    | 5.33E-05   | 4.03E-04     | 9.00E-05  |

### S.4.3 Image Classification

Table S.6. OOD prior probability in image classification task: TinyImages 300K inference result on CIFAR10 model using ResNet18

| class index | 0        | 1          | 2        | 3        | 4        | 5        | 6        | 7        | 8        | 9        |
|-------------|----------|------------|----------|----------|----------|----------|----------|----------|----------|----------|
| class name  | airplane | automobile | bird     | cat      | deer     | dog      | frog     | horse    | ship     | truck    |
| probability | 1.15E-01 | 3.62E-02   | 9.94E-02 | 2.04E-01 | 3.58E-02 | 1.19E-01 | 7.51E-02 | 5.35E-02 | 9.91E-02 | 1.62E-01 |

Table S.7. OOD prior probability in image classification task: TinyImages 300K inference result on CIFAR100 model using ResNet18.

| class index | 0        | 1             | 2         | 3            | 4         | 5        | 6           | 7          | 8            | 9         |
|-------------|----------|---------------|-----------|--------------|-----------|----------|-------------|------------|--------------|-----------|
| class name  | apple    | aquarium_fish | baby      | bear         | beaver    | bed      | bee         | beetle     | bicycle      | bottle    |
| probability | 1.39E-03 | 1.60E-03      | 1.50E-02  | 6.34E-03     | 2.66E-03  | 1.15E-02 | 3.01E-03    | 2.50E-03   | 5.32E-03     | 1.88E-02  |
| class index | 10       | 11            | 12        | 13           | 14        | 15       | 16          | 17         | 18           | 19        |
| class name  | bowl     | boy           | bridge    | bus          | butterfly | camel    | can         | castle     | caterpillar  | cattle    |
| probability | 1.98E-02 | 1.97E-02      | 1.69E-02  | 1.36E-02     | 4.82E-03  | 5.97E-03 | 4.14E-02    | 1.24E-02   | 9.66E-03     | 1.01E-02  |
| class index | 20       | 21            | 22        | 23           | 24        | 25       | 26          | 27         | 28           | 29        |
| class name  | chair    | chimpanzee    | clock     | cloud        | cockroach | couch    | crab        | crocodile  | cup          | dinosaur  |
| probability | 7.11E-03 | 4.63E-03      | 2.11E-02  | 1.93E-02     | 2.88E-03  | 2.62E-02 | 4.44E-03    | 4.88E-03   | 7.81E-03     | 3.48E-03  |
| class index | 30       | 31            | 32        | 33           | 34        | 35       | 36          | 37         | 38           | 39        |
| class name  | dolphin  | elephant      | flatfish  | forest       | fox       | girl     | hamster     | house      | kangaroo     | keyboard  |
| probability | 1.46E-03 | 5.00E-03      | 1.37E-02  | 2.69E-02     | 2.08E-03  | 1.68E-02 | 1.25E-03    | 2.83E-02   | 4.45E-03     | 2.18E-02  |
| class index | 40       | 41            | 42        | 43           | 44        | 45       | 46          | 47         | 48           | 49        |
| class name  | lamp     | lawn_mower    | leopard   | lion         | lizard    | lobster  | man         | maple_tree | motorcycle   | mountain  |
| probability | 2.38E-02 | 5.93E-03      | 3.82E-03  | 9.67E-04     | 9.30E-03  | 1.61E-02 | 7.35E-02    | 2.05E-03   | 8.32E-03     | 6.84E-03  |
| class index | 50       | 51            | 52        | 53           | 54        | 55       | 56          | 57         | 58           | 59        |
| class name  | mouse    | mushroom      | oak_tree  | orange       | orchid    | otter    | palm_tree   | pear       | pickup_truck | pine_tree |
| probability | 3.60E-03 | 6.78E-03      | 8.63E-04  | 3.11E-03     | 1.05E-02  | 5.41E-03 | 3.04E-03    | 5.48E-03   | 6.31E-03     | 9.94E-03  |
| class index | 60       | 61            | 62        | 63           | 64        | 65       | 66          | 67         | 68           | 69        |
| class name  | plain    | plate         | poppy     | porcupine    | possum    | rabbit   | raccoon     | ray        | road         | rocket    |
| probability | 1.14E-02 | 1.46E-02      | 3.08E-03  | 1.42E-03     | 4.73E-03  | 7.11E-03 | 3.10E-03    | 5.36E-03   | 4.87E-03     | 9.77E-03  |
| class index | 70       | 71            | 72        | 73           | 74        | 75       | 76          | 77         | 78           | 79        |
| class name  | rose     | sea           | seal      | shark        | shrew     | skunk    | skyscraper  | snail      | snake        | spider    |
| probability | 4.86E-03 | 1.47E-02      | 4.44E-03  | 5.88E-03     | 1.82E-03  | 2.13E-03 | 8.50E-03    | 2.21E-03   | 8.53E-03     | 5.92E-03  |
| class index | 80       | 81            | 82        | 83           | 84        | 85       | 86          | 87         | 88           | 89        |
| class name  | squirrel | streetcar     | sunflower | sweet_pepper | table     | tank     | telephone   | television | tiger        | tractor   |
| probability | 4.27E-03 | 1.23E-02      | 3.71E-03  | 9.63E-03     | 3.25E-02  | 1.06E-02 | 1.38E-02    | 2.93E-02   | 3.31E-03     | 1.12E-02  |
| class index | 90       | 91            | 92        | 93           | 94        | 95       | 96          | 97         | 98           | 99        |
| class name  | train    | trout         | tulip     | turtle       | wardrobe  | whale    | willow_tree | wolf       | woman        | worm      |
| probability | 8.04E-03 | 2.99E-03      | 6.48E-03  | 2.52E-03     | 2.10E-02  | 2.42E-03 | 9.76E-03    | 3.52E-03   | 2.64E-02     | 1.00E-02  |

## S.5. Detailed Experiment Results

### S.5.1 Semantic Segmentation

Table S.8. Detailed evaluation result in semantic segmentation task depending on  $\gamma$  : OOD detection performance(AUROC,AP,FPR) and accuracy(MIOU for Cityscapes validation) on the Fishyscapes validation sets and Road Anomaly test set

| Method                          |          | City            | FS Lost & Found |               |                  | FS Static      |               |                  | Road Anomaly   |               |                  |
|---------------------------------|----------|-----------------|-----------------|---------------|------------------|----------------|---------------|------------------|----------------|---------------|------------------|
| Name                            | $\gamma$ | MIOU $\uparrow$ | AUC $\uparrow$  | AP $\uparrow$ | FPR $\downarrow$ | AUC $\uparrow$ | AP $\uparrow$ | FPR $\downarrow$ | AUC $\uparrow$ | AP $\uparrow$ | FPR $\downarrow$ |
| EnergyOE                        | 0.0      | 89.07           | 98.14           | 45.61         | 8.21             | 99.32          | 89.12         | 2.62             | 83.32          | 32.59         | 53.01            |
|                                 | 1.0      | 89.04           | 98.01           | 50.42         | 8.87             | 99.34          | 89.28         | 2.33             | 83.61          | 30.73         | 49.96            |
|                                 | 2.0      | <b>89.83</b>    | 98.72           | 53.36         | 6.57             | 99.42          | 90.32         | 2.31             | 84.90          | 33.72         | <b>46.39</b>     |
|                                 | 3.0      | 88.91           | 98.42           | <b>54.58</b>  | 6.70             | <b>99.43</b>   | <b>91.77</b>  | <b>1.63</b>      | <b>85.50</b>   | <b>34.90</b>  | 46.60            |
| EnergyOE                        | 4.0      | 88.53           | <b>98.81</b>    | 53.27         | <b>5.18</b>      | 99.34          | 89.98         | 2.39             | 83.53          | 29.51         | 46.91            |
| Inverse<br>Balanced<br>EnergyOE | -3.0     | 84.28           | 95.49           | 43.94         | 31.28            | 98.45          | 81.32         | 5.66             | 84.92          | 41.17         | 55.57            |

## S.5.2 Long-tailed Image Classification

### ResNet18 model on CIFAR10-LT:

Table S.9. Detailed evaluation result on CIFAR10-LT depending on  $\gamma$  : OOD detection performance (AUROC,AP, FPR) and classification accuracy (ACC) with model ResNet18; Mean over six random runs are reported; (a): ACC and result on Texture, SVHN, and CIFAR100; (b): Total average result and result on Tiny Imagenet, LSUN, and Place365

| (a)                    |          |                |                |               |                  |                |               |                  |                |               |                  |
|------------------------|----------|----------------|----------------|---------------|------------------|----------------|---------------|------------------|----------------|---------------|------------------|
| Method                 |          | ACC $\uparrow$ | Texture        |               |                  | SVHN           |               |                  | CIFAR 100      |               |                  |
| Name                   | $\gamma$ |                | AUC $\uparrow$ | AP $\uparrow$ | FPR $\downarrow$ | AUC $\uparrow$ | AP $\uparrow$ | FPR $\downarrow$ | AUC $\uparrow$ | AP $\uparrow$ | FPR $\downarrow$ |
| Energy OE              | 0.00     | 74.53          | 95.53          | 92.93         | 23.26            | 96.63          | 98.46         | 14.52            | 84.44          | 84.63         | 59.92            |
| Balanced Energy OE     | 0.10     | 75.03          | 95.49          | 91.94         | 22.44            | 96.68          | 97.90         | 12.64            | 84.63          | 84.42         | 59.16            |
|                        | 0.25     | 75.23          | 95.55          | 91.63         | 22.03            | 96.99          | 98.06         | 11.82            | 84.89          | 84.40         | 57.80            |
|                        | 0.50     | 75.92          | 95.70          | 92.05         | 21.13            | 97.49          | 98.63         | 10.48            | 85.18          | 84.78         | 57.09            |
|                        | 0.75     | <b>76.22</b>   | 95.69          | 92.38         | 21.26            | 97.74          | 98.89         | 9.87             | 85.20          | 84.98         | 57.95            |
|                        | 1.00     | 74.85          | 95.56          | 92.57         | 22.57            | 97.94          | 99.03         | 9.11             | 84.84          | 84.90         | 61.18            |
| Inv-Balanced Energy OE | -0.75    | 64.24          | 95.19          | 92.14         | 27.52            | 96.59          | 98.48         | 18.89            | 81.76          | 81.91         | 63.45            |

| (b)      |                |               |                  |                |               |                  |                |               |                  |                |               |                  |
|----------|----------------|---------------|------------------|----------------|---------------|------------------|----------------|---------------|------------------|----------------|---------------|------------------|
| Method   | Tiny ImageNet  |               |                  | LSUN           |               |                  | Place365       |               |                  | Average        |               |                  |
| $\gamma$ | AUC $\uparrow$ | AP $\uparrow$ | FPR $\downarrow$ | AUC $\uparrow$ | AP $\uparrow$ | FPR $\downarrow$ | AUC $\uparrow$ | AP $\uparrow$ | FPR $\downarrow$ | AUC $\uparrow$ | AP $\uparrow$ | FPR $\downarrow$ |
| 0.00     | 88.40          | 84.95         | 45.17            | 94.00          | 93.70         | 26.96            | 92.51          | 97.14         | 32.88            | 91.92          | 91.97         | 33.79            |
| 0.10     | 88.51          | 84.58         | 44.56            | 94.12          | 93.49         | 26.36            | 92.67          | 97.10         | 31.61            | 92.01          | 91.57         | 32.80            |
| 0.25     | 88.63          | 84.37         | 43.29            | 94.12          | 92.72         | 25.52            | 92.79          | 96.98         | 30.54            | 92.16          | 91.36         | 31.83            |
| 0.50     | 88.85          | 84.71         | 42.46            | 94.30          | 92.80         | 24.62            | 93.10          | 97.08         | 29.11            | 92.44          | 91.67         | 30.81            |
| 0.75     | 88.92          | 84.98         | 42.38            | 94.48          | 93.15         | 23.88            | 93.35          | 97.23         | 28.25            | <b>92.56</b>   | 91.94         | <b>30.60</b>     |
| 1.00     | 88.74          | 85.06         | 43.11            | 94.36          | 93.35         | 25.71            | 93.26          | 97.27         | 29.46            | 92.45          | <b>92.03</b>  | 31.86            |
| 1.25     | 88.47          | 84.95         | 44.07            | 94.31          | 93.56         | 26.46            | 93.24          | 97.30         | 30.15            | 92.33          | <b>92.03</b>  | 32.60            |
| -0.75    | 86.70          | 82.96         | 50.86            | 93.10          | 92.86         | 36.08            | 91.14          | 96.62         | 42.15            | 90.75          | 90.83         | 39.82            |

Table S.10. Detailed evaluation result on CIFAR10-LT depending on  $\gamma$  : OOD detection performance (AUROC,AP, FPR) and classification accuracy (ACC) with model ResNet18; Std over six random runs are reported; (a): ACC and result on Texture, SVHN, and CIFAR100; (b): Total average result and result on Tiny Imagenet, LSUN, and Place365

| (a)                    |          |          |          |          |          |          |          |          |           |          |          |
|------------------------|----------|----------|----------|----------|----------|----------|----------|----------|-----------|----------|----------|
| Method                 |          | ACC↑     | Texture  |          |          | SVHN     |          |          | CIFAR 100 |          |          |
| Name                   | $\gamma$ |          | AUC↑     | AP↑      | FPR↓     | AUC↑     | AP↑      | FPR↓     | AUC↑      | AP↑      | FPR↓     |
| Energy OE              | 0.00     | 3.09E-02 | 3.73E-03 | 8.98E-03 | 1.43E-01 | 3.82E-02 | 1.89E-02 | 1.14E-01 | 5.00E-03  | 5.00E-03 | 8.22E-02 |
| Balanced Energy OE     | 0.10     | 2.63E-02 | 5.00E-03 | 1.11E-02 | 8.76E-02 | 2.97E-02 | 1.89E-02 | 1.52E-01 | 7.64E-03  | 9.43E-03 | 1.59E-01 |
|                        | 0.25     | 4.75E-02 | 6.87E-03 | 1.49E-02 | 8.96E-02 | 1.97E-02 | 1.73E-02 | 1.03E-01 | 1.00E-02  | 1.15E-02 | 8.42E-02 |
|                        | 0.50     | 4.83E-02 | 5.77E-03 | 2.13E-02 | 5.93E-02 | 1.61E-02 | 8.16E-03 | 8.55E-02 | 6.87E-03  | 1.29E-02 | 1.37E-01 |
|                        | 0.75     | 3.73E-02 | 8.98E-03 | 2.71E-02 | 1.30E-01 | 9.57E-03 | 6.87E-03 | 1.15E-01 | 5.77E-03  | 1.29E-02 | 1.79E-01 |
|                        | 1.00     | 5.15E-02 | 6.87E-03 | 2.21E-02 | 1.51E-01 | 1.41E-02 | 6.87E-03 | 9.36E-02 | 7.64E-03  | 8.98E-03 | 1.22E-01 |
|                        | 1.25     | 4.12E-02 | 1.07E-02 | 2.69E-02 | 1.13E-01 | 2.52E-02 | 1.49E-02 | 9.93E-02 | 8.98E-03  | 9.43E-03 | 1.28E-01 |
| Inv-Balanced Energy OE | -0.75    | 4.89E-02 | 4.71E-03 | 7.45E-03 | 1.22E-01 | 2.11E-02 | 1.26E-02 | 1.39E-01 | 4.71E-03  | 4.71E-03 | 9.64E-02 |

| (b)      |               |          |          |          |          |          |          |          |          |          |          |          |
|----------|---------------|----------|----------|----------|----------|----------|----------|----------|----------|----------|----------|----------|
| Method   | Tiny ImageNet |          |          | LSUN     |          |          | Place365 |          |          | Average  |          |          |
| $\gamma$ | AUC↑          | AP↑      | FPR↓     | AUC↑     | AP↑      | FPR↓     | AUC↑     | AP↑      | FPR↓     | AUC↑     | AP↑      | FPR↓     |
| 0.00     | 5.00E-03      | 3.73E-03 | 1.03E-01 | 9.43E-03 | 9.57E-03 | 5.35E-02 | 3.73E-03 | 0.00E+00 | 6.47E-02 | 1.08E-02 | 7.70E-03 | 9.34E-02 |
| 0.10     | 9.57E-03      | 6.87E-03 | 1.46E-01 | 3.73E-03 | 8.98E-03 | 9.69E-02 | 5.00E-03 | 5.00E-03 | 6.59E-02 | 1.01E-02 | 1.00E-02 | 1.18E-01 |
| 0.25     | 5.00E-03      | 1.34E-02 | 3.65E-02 | 1.15E-02 | 1.26E-02 | 9.09E-02 | 8.16E-03 | 5.00E-03 | 7.69E-02 | 1.02E-02 | 1.25E-02 | 8.01E-02 |
| 0.50     | 3.73E-03      | 8.98E-03 | 5.21E-02 | 6.87E-03 | 1.21E-02 | 6.88E-02 | 7.45E-03 | 4.71E-03 | 5.98E-02 | 7.80E-03 | 1.14E-02 | 7.71E-02 |
| 0.75     | 1.11E-02      | 1.07E-02 | 1.16E-01 | 7.64E-03 | 1.34E-02 | 7.16E-02 | 4.71E-03 | 5.00E-03 | 1.38E-01 | 7.96E-03 | 1.27E-02 | 1.25E-01 |
| 1.00     | 7.64E-03      | 1.70E-02 | 4.16E-02 | 1.29E-02 | 1.89E-02 | 1.59E-01 | 4.71E-03 | 5.00E-03 | 4.74E-02 | 8.99E-03 | 1.31E-02 | 1.03E-01 |
| 1.25     | 9.43E-03      | 1.11E-02 | 6.99E-02 | 5.77E-03 | 8.98E-03 | 1.84E-01 | 5.00E-03 | 3.73E-03 | 5.43E-02 | 1.08E-02 | 1.25E-02 | 1.08E-01 |
| -0.75    | 3.73E-03      | 6.87E-03 | 1.47E-01 | 3.73E-03 | 5.77E-03 | 7.29E-02 | 3.73E-03 | 5.00E-03 | 7.57E-02 | 6.96E-03 | 7.07E-03 | 1.09E-01 |

# ResNet18 model on CIFAR100-LT:

Table S.11. Detailed evaluation result on CIFAR100-LT depending on  $\gamma$  : OOD detection performance (AUROC,AP, FPR) and classification accuracy (ACC) with model ResNet18; Mean over six random runs are reported; (a): ACC and result on Texture, SVHN, and CIFAR10; (b): Total average result and result on Tiny Imagenet, LSUN, and Place365

(a)

| Method                 |          | ACC $\uparrow$ | Texture        |               |                  | SVHN           |               |                  | CIFAR 10       |               |                  |
|------------------------|----------|----------------|----------------|---------------|------------------|----------------|---------------|------------------|----------------|---------------|------------------|
| Name                   | $\gamma$ |                | AUC $\uparrow$ | AP $\uparrow$ | FPR $\downarrow$ | AUC $\uparrow$ | AP $\uparrow$ | FPR $\downarrow$ | AUC $\uparrow$ | AP $\uparrow$ | FPR $\downarrow$ |
| Energy OE              | 0.00     | 40.65          | 79.56          | 70.88         | 68.60            | 86.19          | 91.74         | 42.27            | 61.15          | 56.66         | 82.60            |
| Balanced Energy OE     | 0.10     | 40.90          | 79.78          | 70.80         | 68.01            | 86.65          | 91.93         | 41.01            | 61.29          | 56.65         | 82.19            |
|                        | 0.25     | 41.50          | 80.06          | 69.91         | 66.93            | 86.91          | 91.99         | 39.46            | 61.24          | 56.51         | 82.23            |
|                        | 0.50     | <b>41.64</b>   | 81.01          | 70.87         | 65.50            | 87.45          | 92.15         | 36.93            | 61.38          | 55.73         | 83.49            |
|                        | 0.75     | 41.05          | 82.10          | 73.09         | 64.19            | 88.66          | 92.88         | 33.79            | 59.40          | 54.97         | 85.16            |
|                        | 1.00     | 38.62          | 83.28          | 75.67         | 63.54            | 89.68          | 93.71         | 32.64            | 58.81          | 54.60         | 86.46            |
|                        | 1.25     | 36.51          | 84.33          | 77.49         | 62.14            | 90.71          | 94.48         | 30.90            | 58.29          | 54.30         | 87.42            |
| Inv-Balanced Energy OE | -0.75    | 34.77          | 82.79          | 77.96         | 70.45            | 83.12          | 90.07         | 51.32            | 58.34          | 54.32         | 88.17            |

(b)

| Method   | Tiny ImageNet  |               |                  | LSUN           |               |                  | Place365       |               |                  | Average        |               |                  |
|----------|----------------|---------------|------------------|----------------|---------------|------------------|----------------|---------------|------------------|----------------|---------------|------------------|
| $\gamma$ | AUC $\uparrow$ | AP $\uparrow$ | FPR $\downarrow$ | AUC $\uparrow$ | AP $\uparrow$ | FPR $\downarrow$ | AUC $\uparrow$ | AP $\uparrow$ | FPR $\downarrow$ | AUC $\uparrow$ | AP $\uparrow$ | FPR $\downarrow$ |
| 0.00     | 70.78          | 55.90         | 74.43            | 81.61          | 69.16         | 57.37            | 79.12          | 89.09         | 61.96            | 76.40          | 72.24         | 64.54            |
| 0.10     | 70.89          | 55.85         | 74.23            | 81.94          | 69.37         | 56.53            | 79.42          | 89.18         | 60.93            | 76.66          | 72.29         | 63.82            |
| 0.25     | 71.10          | 55.85         | 74.12            | 82.35          | 69.55         | 55.50            | 79.86          | 89.31         | 59.54            | 76.92          | 72.18         | 62.96            |
| 0.50     | 71.36          | 56.15         | 73.81            | 83.25          | 70.48         | 52.87            | 80.65          | 89.65         | 58.09            | 77.35          | 72.50         | 61.78            |
| 0.75     | 71.42          | 56.52         | 74.22            | 83.83          | 71.23         | 52.04            | 81.10          | 89.94         | 57.52            | 77.75          | 73.10         | <b>61.15</b>     |
| 1.00     | 71.41          | 56.76         | 75.08            | 83.76          | 71.40         | 53.46            | 81.12          | 90.09         | 58.79            | <b>78.01</b>   | 73.70         | 61.66            |
| 1.25     | 71.38          | 56.81         | 75.18            | 82.85          | 70.92         | 58.68            | 80.17          | 89.83         | 64.16            | 77.96          | <b>73.97</b>  | 63.08            |
| -0.75    | 69.27          | 55.59         | 77.09            | 80.20          | 68.79         | 66.63            | 77.09          | 88.64         | 70.64            | 75.14          | 72.56         | 70.71            |

Table S.12. Detailed evaluation result on CIFAR100-LT depending on  $\gamma$  : OOD detection performance (AUROC,AP, FPR) and classification accuracy (ACC) with model ResNet18; Std over six random runs are reported; (a): ACC and result on Texture, SVHN, and CIFAR10; (b): Total average result and result on Tiny Imagenet, LSUN, and Place365

(a)

| Method                 |          | ACC $\uparrow$ | Texture        |               |                  | SVHN           |               |                  | CIFAR 10       |               |                  |
|------------------------|----------|----------------|----------------|---------------|------------------|----------------|---------------|------------------|----------------|---------------|------------------|
| Name                   | $\gamma$ |                | AUC $\uparrow$ | AP $\uparrow$ | FPR $\downarrow$ | AUC $\uparrow$ | AP $\uparrow$ | FPR $\downarrow$ | AUC $\uparrow$ | AP $\uparrow$ | FPR $\downarrow$ |
| Energy OE              | 0.00     | 1.63E-02       | 3.73E-03       | 1.25E-02      | 4.22E-02         | 2.03E-02       | 1.41E-02      | 4.07E-02         | 4.71E-03       | 3.73E-03      | 2.93E-02         |
| Balanced Energy OE     | 0.10     | 2.48E-02       | 1.12E-02       | 2.29E-02      | 6.19E-02         | 1.53E-02       | 1.11E-02      | 4.23E-02         | 0.00E+00       | 4.71E-03      | 2.92E-02         |
|                        | 0.25     | 2.91E-02       | 3.73E-03       | 6.87E-03      | 6.47E-02         | 1.86E-02       | 1.77E-02      | 8.08E-02         | 4.71E-03       | 5.00E-03      | 2.99E-02         |
|                        | 0.50     | 2.48E-02       | 9.57E-03       | 1.71E-02      | 5.16E-02         | 2.27E-02       | 1.61E-02      | 4.81E-02         | 4.71E-03       | 5.00E-03      | 4.36E-02         |
|                        | 0.75     | 3.64E-02       | 7.45E-03       | 1.25E-02      | 1.09E-01         | 1.95E-02       | 1.41E-02      | 2.11E-02         | 3.73E-03       | 3.73E-03      | 3.09E-02         |
|                        | 1.00     | 3.35E-02       | 9.43E-03       | 8.98E-03      | 1.06E-01         | 2.21E-02       | 1.38E-02      | 1.36E-01         | 5.77E-03       | 3.73E-03      | 4.35E-02         |
|                        | 1.25     | 3.83E-02       | 9.43E-03       | 1.15E-02      | 4.99E-02         | 2.13E-02       | 1.89E-02      | 8.65E-02         | 7.64E-03       | 9.57E-03      | 4.35E-02         |
| Inv-Balanced Energy OE | -0.75    | 2.31E-02       | 4.71E-03       | 4.71E-03      | 2.81E-02         | 2.00E-02       | 1.26E-02      | 7.39E-02         | 7.11E-15       | 4.71E-03      | 2.08E-02         |

(b)

| Method   | Tiny ImageNet  |               |                  | LSUN           |               |                  | Place365       |               |                  | Average        |               |                  |
|----------|----------------|---------------|------------------|----------------|---------------|------------------|----------------|---------------|------------------|----------------|---------------|------------------|
| $\gamma$ | AUC $\uparrow$ | AP $\uparrow$ | FPR $\downarrow$ | AUC $\uparrow$ | AP $\uparrow$ | FPR $\downarrow$ | AUC $\uparrow$ | AP $\uparrow$ | FPR $\downarrow$ | AUC $\uparrow$ | AP $\uparrow$ | FPR $\downarrow$ |
| 0.00     | 1.42E-14       | 4.71E-03      | 4.41E-02         | 0.00E+00       | 4.71E-03      | 9.09E-02         | 0.00E+00       | 1.42E-14      | 4.12E-02         | 4.80E-03       | 6.63E-03      | 4.81E-02         |
| 0.10     | 0.00E+00       | 3.73E-03      | 3.59E-02         | 5.00E-03       | 4.71E-03      | 8.35E-02         | 0.00E+00       | 5.00E-03      | 3.53E-02         | 5.24E-03       | 8.68E-03      | 4.80E-02         |
| 0.25     | 4.71E-03       | 4.71E-03      | 4.34E-02         | 3.73E-03       | 3.73E-03      | 4.14E-02         | 4.71E-03       | 3.73E-03      | 1.63E-02         | 6.70E-03       | 6.96E-03      | 4.61E-02         |
| 0.50     | 0.00E+00       | 4.71E-03      | 5.58E-02         | 4.71E-03       | 3.73E-03      | 6.15E-02         | 5.00E-03       | 3.73E-03      | 6.74E-02         | 7.78E-03       | 8.39E-03      | 5.47E-02         |
| 0.75     | 3.73E-03       | 6.87E-03      | 6.52E-02         | 0.00E+00       | 5.00E-03      | 7.91E-02         | 4.71E-03       | 5.00E-03      | 4.26E-02         | 6.52E-03       | 7.87E-03      | 5.80E-02         |
| 1.00     | 6.87E-03       | 1.07E-02      | 3.50E-02         | 5.77E-03       | 6.87E-03      | 4.78E-02         | 3.73E-03       | 4.71E-03      | 5.89E-02         | 8.95E-03       | 8.13E-03      | 7.11E-02         |
| 1.25     | 4.71E-03       | 4.71E-03      | 6.08E-02         | 1.07E-02       | 1.11E-02      | 3.73E-02         | 7.45E-03       | 0.00E+00      | 5.55E-02         | 1.02E-02       | 9.30E-03      | 5.56E-02         |
| -0.75    | 0.00E+00       | 4.71E-03      | 2.67E-02         | 5.77E-03       | 6.87E-03      | 2.63E-02         | 4.71E-03       | 0.00E+00      | 3.89E-02         | 5.87E-03       | 5.60E-03      | 3.58E-02         |

### WideResNet model on CIFAR10-LT:

Table S.13. Detailed evaluation result on CIFAR10-LT depending on  $\gamma$  : OOD detection performance (AUROC,AP, FPR) and classification accuracy (ACC) with model WideResNet(WRN-40-2); Mean over six random runs are reported; (a): ACC and result on Texture, SVHN, and CIFAR100; (b): Total average result and result on Tiny Imagenet, LSUN, and Place365

| Method                 |          | ACC $\uparrow$ | Texture        |               |                  | SVHN           |               |                  | CIFAR 100      |               |                  |
|------------------------|----------|----------------|----------------|---------------|------------------|----------------|---------------|------------------|----------------|---------------|------------------|
| Name                   | $\gamma$ |                | AUC $\uparrow$ | AP $\uparrow$ | FPR $\downarrow$ | AUC $\uparrow$ | AP $\uparrow$ | FPR $\downarrow$ | AUC $\uparrow$ | AP $\uparrow$ | FPR $\downarrow$ |
| Energy OE              | 0.00     | 75.03          | 94.25          | 89.94         | 26.79            | 95.07          | 96.66         | 16.08            | 84.20          | 84.00         | 57.71            |
| Balanced Energy OE     | 0.10     | 75.28          | 94.39          | 89.27         | 25.82            | 95.22          | 96.34         | 14.76            | 84.39          | 83.81         | 56.63            |
|                        | 0.25     | 75.74          | 94.32          | 88.57         | 25.55            | 95.43          | 96.33         | 13.87            | 84.60          | 83.64         | 55.22            |
|                        | 0.50     | <b>76.14</b>   | 94.31          | 88.39         | 26.08            | 95.83          | 96.73         | 12.75            | 84.80          | 83.81         | 54.68            |
|                        | 0.75     | 74.76          | 94.23          | 88.75         | 26.51            | 96.23          | 97.12         | 12.24            | 84.50          | 83.66         | 56.59            |
|                        | 1.00     | 71.20          | 94.14          | 89.77         | 29.40            | 96.51          | 97.74         | 12.56            | 84.00          | 83.50         | 58.40            |
|                        | 1.25     | 68.70          | 94.06          | 90.32         | 31.19            | 96.63          | 98.11         | 13.97            | 83.60          | 83.33         | 59.46            |
| Inv-Balanced Energy OE | -0.75    | 62.91          | 93.15          | 90.49         | 39.41            | 94.22          | 97.22         | 24.63            | 80.54          | 80.87         | 65.46            |

(a)

| Method   | ACC $\uparrow$ | Tiny ImageNet  |               |                  | LSUN           |               |                  | Place365       |               |                  | Average        |               |                  |
|----------|----------------|----------------|---------------|------------------|----------------|---------------|------------------|----------------|---------------|------------------|----------------|---------------|------------------|
| $\gamma$ |                | AUC $\uparrow$ | AP $\uparrow$ | FPR $\downarrow$ | AUC $\uparrow$ | AP $\uparrow$ | FPR $\downarrow$ | AUC $\uparrow$ | AP $\uparrow$ | FPR $\downarrow$ | AUC $\uparrow$ | AP $\uparrow$ | FPR $\downarrow$ |
| 0.00     | 75.03          | 87.63          | 83.86         | 47.77            | 94.80          | 94.41         | 24.17            | 92.72          | 97.17         | 31.58            | 91.44          | 91.01         | 34.02            |
| 0.10     | 75.28          | 87.82          | 83.75         | 46.80            | 94.78          | 93.81         | 22.68            | 92.84          | 97.06         | 29.98            | 91.57          | 90.67         | 32.78            |
| 0.25     | 75.74          | 87.97          | 83.61         | 45.47            | 94.72          | 93.03         | 21.51            | 92.89          | 96.89         | 28.90            | 91.65          | 90.34         | 31.75            |
| 0.50     | <b>76.14</b>   | 88.12          | 83.76         | 44.61            | 94.90          | 93.23         | 20.45            | 93.16          | 96.96         | 27.61            | <b>91.85</b>   | 90.48         | <b>31.03</b>     |
| 0.75     | 74.76          | 87.91          | 83.71         | 45.68            | 94.94          | 93.67         | 20.91            | 93.19          | 97.05         | 28.25            | 91.83          | 90.66         | 31.69            |
| 1.00     | 71.20          | 87.59          | 83.56         | 47.68            | 94.91          | 94.25         | 22.63            | 93.19          | 97.21         | 29.08            | 91.72          | 91.01         | 33.29            |
| 1.25     | 68.70          | 87.22          | 83.42         | 48.87            | 94.81          | 92.28         | 23.16            | 93.06          | 97.22         | 30.14            | 91.56          | <b>91.11</b>  | 34.46            |
| -0.75    | 62.91          | 84.81          | 81.26         | 56.31            | 92.93          | 92.66         | 36.62            | 90.38          | 96.35         | 44.05            | 89.34          | 89.81         | 44.41            |

(b)

Table S.14. Detailed evaluation result on CIFAR10-LT depending on  $\gamma$  : OOD detection performance (AUROC,AP, FPR) and classification accuracy (ACC) with model WideResNet(WRN-40-2); Std over six random runs are reported; (a): ACC and result on Texture, SVHN, and CIFAR100; (b): Total average result and result on Tiny Imagenet, LSUN, and Place365

| Method                 |          | ACC $\uparrow$ | Texture        |               |                  | SVHN           |               |                  | CIFAR 100      |               |                  |
|------------------------|----------|----------------|----------------|---------------|------------------|----------------|---------------|------------------|----------------|---------------|------------------|
| Name                   | $\gamma$ |                | AUC $\uparrow$ | AP $\uparrow$ | FPR $\downarrow$ | AUC $\uparrow$ | AP $\uparrow$ | FPR $\downarrow$ | AUC $\uparrow$ | AP $\uparrow$ | FPR $\downarrow$ |
| Energy OE              | 0.00     | 4.92E-02       | 6.87E-03       | 1.26E-02      | 7.27E-02         | 1.49E-02       | 1.25E-02      | 5.34E-02         | 6.87E-03       | 6.87E-03      | 1.36E-01         |
| Balanced Energy OE     | 0.10     | 3.80E-02       | 5.77E-03       | 1.63E-02      | 1.27E-01         | 1.34E-02       | 9.57E-03      | 4.35E-02         | 3.73E-03       | 3.73E-03      | 6.90E-02         |
|                        | 0.25     | 3.72E-02       | 9.43E-03       | 2.67E-02      | 1.34E-01         | 1.71E-02       | 1.73E-02      | 4.76E-02         | 5.77E-03       | 1.11E-02      | 7.86E-02         |
|                        | 0.50     | 4.74E-02       | 6.87E-03       | 4.20E-02      | 9.52E-02         | 1.80E-02       | 1.67E-02      | 7.24E-02         | 4.71E-03       | 1.61E-02      | 9.99E-02         |
|                        | 0.75     | 5.70E-02       | 9.43E-03       | 5.27E-02      | 1.56E-01         | 1.57E-02       | 1.57E-02      | 1.25E-01         | 1.11E-02       | 2.06E-02      | 2.15E-01         |
|                        | 1.00     | 6.52E-02       | 1.12E-02       | 4.56E-02      | 1.39E-01         | 1.71E-02       | 2.81E-02      | 1.66E-01         | 6.87E-03       | 1.95E-02      | 2.36E-01         |
|                        | 1.25     | 8.08E-02       | 2.48E-02       | 4.15E-02      | 1.65E-01         | 5.19E-02       | 4.11E-02      | 2.43E-01         | 1.70E-02       | 1.80E-02      | 1.47E-01         |
| Inv-Balanced Energy OE | -0.75    | 2.49E-02       | 1.34E-02       | 2.29E-02      | 1.34E-01         | 3.02E-02       | 1.50E-02      | 1.26E-01         | 0.00E+00       | 6.87E-03      | 1.05E-01         |

(a)

| Method   | Tiny ImageNet  |               |                  | LSUN           |               |                  | Place365       |               |                  | Average        |               |                  |
|----------|----------------|---------------|------------------|----------------|---------------|------------------|----------------|---------------|------------------|----------------|---------------|------------------|
| $\gamma$ | AUC $\uparrow$ | AP $\uparrow$ | FPR $\downarrow$ | AUC $\uparrow$ | AP $\uparrow$ | FPR $\downarrow$ | AUC $\uparrow$ | AP $\uparrow$ | FPR $\downarrow$ | AUC $\uparrow$ | AP $\uparrow$ | FPR $\downarrow$ |
| 0.00     | 5.00E-03       | 7.45E-03      | 5.89E-02         | 6.87E-03       | 6.87E-03      | 6.09E-02         | 5.77E-03       | 3.73E-03      | 6.59E-02         | 7.72E-03       | 8.33E-03      | 7.46E-02         |
| 0.10     | 7.45E-03       | 6.87E-03      | 1.10E-01         | 3.73E-03       | 7.45E-03      | 8.56E-02         | 4.71E-03       | 3.73E-03      | 8.64E-02         | 6.47E-03       | 7.95E-03      | 8.69E-02         |
| 0.25     | 3.73E-03       | 8.98E-03      | 7.39E-02         | 6.87E-03       | 1.60E-02      | 5.44E-02         | 0.00E+00       | 5.00E-03      | 4.53E-02         | 7.15E-03       | 1.42E-02      | 7.22E-02         |
| 0.50     | 7.64E-03       | 2.13E-02      | 5.25E-02         | 3.73E-03       | 1.71E-02      | 5.87E-02         | 6.87E-03       | 7.45E-03      | 6.38E-02         | 7.97E-03       | 2.01E-02      | 7.38E-02         |
| 0.75     | 4.71E-03       | 6.87E-03      | 1.30E-01         | 6.87E-03       | 1.53E-02      | 7.74E-02         | 6.87E-03       | 4.71E-03      | 1.13E-01         | 9.11E-03       | 1.93E-02      | 1.36E-01         |
| 1.00     | 1.26E-02       | 2.49E-02      | 1.65E-01         | 1.07E-02       | 2.11E-02      | 1.08E-01         | 1.11E-02       | 9.43E-03      | 7.04E-02         | 1.16E-02       | 2.48E-02      | 1.48E-01         |
| 1.25     | 1.25E-02       | 1.29E-02      | 1.93E-01         | 1.37E-02       | 2.54E-02      | 9.66E-02         | 3.73E-03       | 5.00E-03      | 9.37E-02         | 2.06E-02       | 2.40E-02      | 1.56E-01         |
| -0.75    | 5.77E-03       | 6.87E-03      | 7.06E-02         | 7.45E-03       | 1.86E-02      | 1.05E-01         | 5.77E-03       | 5.00E-03      | 5.93E-02         | 1.04E-02       | 1.25E-02      | 1.00E-01         |

(b)

### WideResNet model on CIFAR100-LT:

Table S.15. Detailed evaluation result on CIFAR100-LT depending on  $\gamma$ : OOD detection performance (AUROC, AP, FPR) and classification accuracy (ACC) with model WideResNet(WRN-40-2); Mean over six random runs are reported; (a): ACC and result on Texture, SVHN, and CIFAR10; (b): Total average result and result on Tiny Imagenet, LSUN, and Place365; N/A: not available because of unstable neural networks training

[illegible][illegible]

Table S.16. Detailed evaluation result on CIFAR100-LT depending on  $\gamma$ : OOD detection performance (AUROC, AP, FPR) and classification accuracy (ACC) with model WideResNet(WRN-40-2); Std over six random runs are reported; (a): ACC and result on Texture, SVHN, and CIFAR10; (b): Total average result and result on Tiny Imagenet, LSUN, and Place365; N/A: not available because of unstable neural networks training

[illegible][illegible]

### S.5.3 Image Classification

#### ResNet18 model on CIFAR10:

Table S.17. Evaluation result on CIFAR10 using ResNet18 : OOD detection performance with AUROC,AP and FPR; Mean over six random runs are reported(OE,EnergyOE,Ours).

| Dataset       | Method          | AUC↑         | AP↑          | FPR↓         |
|---------------|-----------------|--------------|--------------|--------------|
| Texture       | OE (tune)       | 97.90        | 96.41        | 11.67        |
|               | EnergyOE (tune) | 98.88        | <b>98.13</b> | 5.94         |
|               | <b>Ours</b>     | <b>98.90</b> | 98.01        | <b>5.65</b>  |
| SVHN          | OE (tune)       | 98.67        | 99.44        | 7.10         |
|               | EnergyOE (tune) | 98.88        | 99.57        | 6.51         |
|               | <b>Ours</b>     | <b>98.97</b> | <b>99.60</b> | <b>5.68</b>  |
| CIFAR100      | OE (tune)       | 92.07        | 91.39        | <b>31.05</b> |
|               | EnergyOE (tune) | <b>92.61</b> | <b>92.76</b> | 34.41        |
|               | <b>Ours</b>     | 92.54        | 92.64        | 34.27        |
| Tiny ImageNet | OE (tune)       | 93.17        | 90.36        | 25.39        |
|               | EnergyOE (tune) | <b>94.61</b> | <b>92.76</b> | <b>22.79</b> |
|               | <b>Ours</b>     | 94.59        | 92.68        | 23.56        |
| LSUN          | OE (tune)       | 96.63        | 96.25        | 15.22        |
|               | EnergyOE (tune) | 98.34        | 98.16        | 7.33         |
|               | <b>Ours</b>     | <b>98.50</b> | <b>98.23</b> | <b>6.60</b>  |
| Places365     | OE (tune)       | 95.63        | 98.31        | 18.80        |
|               | EnergyOE (tune) | 97.31        | 98.98        | 11.97        |
|               | <b>Ours</b>     | <b>97.47</b> | <b>99.01</b> | <b>11.28</b> |
| Average       | OE (tune)       | 95.68        | 95.36        | 18.20        |
|               | EnergyOE (tune) | 96.77        | <b>96.72</b> | 14.82        |
|               | <b>Ours</b>     | <b>96.83</b> | 96.70        | <b>14.51</b> |

Table S.18. Evaluation result on CIFAR10 using ResNet18 : OOD detection performance with AUROC,AP and FPR; Std over six random runs are reported(OE,EnergyOE,Ours).

| Dataset       | Method          | AUC↑     | AP↑      | FPR↓     |
|---------------|-----------------|----------|----------|----------|
| Texture       | OE (tune)       | 1.42E-14 | 1.42E-14 | 1.77E-02 |
|               | EnergyOE (tune) | 4.71E-03 | 6.87E-03 | 4.08E-02 |
|               | <b>Ours</b>     | 6.87E-03 | 1.00E-02 | 6.79E-02 |
| SVHN          | OE (tune)       | 0.00E+00 | 0.00E+00 | 3.73E-03 |
|               | EnergyOE (tune) | 1.49E-02 | 5.00E-03 | 9.84E-02 |
|               | <b>Ours</b>     | 2.38E-02 | 8.98E-03 | 1.69E-01 |
| CIFAR100      | OE (tune)       | 0.00E+00 | 0.00E+00 | 2.03E-02 |
|               | EnergyOE (tune) | 8.98E-03 | 5.00E-03 | 1.23E-01 |
|               | <b>Ours</b>     | 8.98E-03 | 9.57E-03 | 5.40E-02 |
| Tiny ImageNet | OE (tune)       | 0.00E+00 | 0.00E+00 | 7.64E-03 |
|               | EnergyOE (tune) | 3.73E-03 | 3.73E-03 | 7.56E-02 |
|               | <b>Ours</b>     | 6.87E-03 | 5.77E-03 | 7.65E-02 |
| LSUN          | OE (tune)       | 0.00E+00 | 0.00E+00 | 6.87E-03 |
|               | EnergyOE (tune) | 7.45E-03 | 7.64E-03 | 4.28E-02 |
|               | <b>Ours</b>     | 5.00E-03 | 4.71E-03 | 6.99E-02 |
| Places365     | OE (tune)       | 0.00E+00 | 0.00E+00 | 7.45E-03 |
|               | EnergyOE (tune) | 6.87E-03 | 0.00E+00 | 1.57E-02 |
|               | <b>Ours</b>     | 3.73E-03 | 3.73E-03 | 4.82E-02 |
| Average       | OE (tune)       | 2.37E-15 | 8.33E-04 | 1.15E-02 |
|               | EnergyOE (tune) | 3.44E-03 | 2.62E-03 | 3.21E-02 |
|               | <b>Ours</b>     | 3.30E-03 | 3.52E-03 | 2.86E-02 |



**ResNet18 model on CIFAR100:**

Table S.19. Evaluation result on CIFAR100 using ResNet18 : OOD detection performance with AUROC,AP and FPR; Mean over six random runs are reported(OE,EnergyOE,Ours).

| Dataset       | Method          | AUC↑         | AP↑          | FPR↓         |
|---------------|-----------------|--------------|--------------|--------------|
| Texture       | OE (tune)       | 83.69        | 71.62        | 50.41        |
|               | EnergyOE (tune) | 89.03        | 80.83        | 38.02        |
|               | <b>Ours</b>     | <b>89.11</b> | <b>80.94</b> | <b>37.78</b> |
| SVHN          | OE (tune)       | 85.15        | 91.45        | 45.70        |
|               | EnergyOE (tune) | 93.14        | 96.19        | 23.22        |
|               | <b>Ours</b>     | <b>93.41</b> | <b>96.33</b> | <b>22.48</b> |
| CIFAR10       | OE (tune)       | <b>75.52</b> | <b>70.46</b> | 63.52        |
|               | EnergyOE (tune) | 74.96        | 69.20        | <b>62.83</b> |
|               | <b>Ours</b>     | 74.70        | 68.74        | 63.43        |
| Tiny ImageNet | OE (tune)       | 79.67        | 65.58        | <b>57.13</b> |
|               | EnergyOE (tune) | <b>80.48</b> | <b>67.74</b> | 58.15        |
|               | <b>Ours</b>     | 80.36        | 67.56        | 58.61        |
| LSUN          | OE (tune)       | 86.11        | 75.38        | 46.25        |
|               | EnergyOE (tune) | 88.26        | <b>77.72</b> | 38.34        |
|               | <b>Ours</b>     | <b>88.34</b> | 77.68        | <b>37.89</b> |
| Places365     | OE (tune)       | 86.41        | 93.11        | 47.31        |
|               | EnergyOE (tune) | <b>89.19</b> | <b>94.27</b> | 37.56        |
|               | <b>Ours</b>     | 89.17        | 94.22        | <b>37.40</b> |
| Average       | OE (tune)       | 82.76        | 77.93        | 51.72        |
|               | EnergyOE (tune) | 85.84        | <b>80.99</b> | 43.02        |
|               | <b>Ours</b>     | <b>85.85</b> | 80.91        | <b>42.93</b> |

Table S.20. Evaluation result on CIFAR100 using ResNet18 : OOD detection performance with AUROC,AP and FPR; Std over six random runs are reported(OE,EnergyOE,Ours).

| Dataset       | Method          | AUC↑     | AP↑      | FPR↓     |
|---------------|-----------------|----------|----------|----------|
| Texture       | OE (tune)       | 0.00E+00 | 4.71E-03 | 9.57E-03 |
|               | EnergyOE (tune) | 6.87E-03 | 1.49E-02 | 1.16E-01 |
|               | <b>Ours</b>     | 1.21E-02 | 1.89E-02 | 1.29E-01 |
| SVHN          | OE (tune)       | 3.73E-03 | 0.00E+00 | 2.05E-02 |
|               | EnergyOE (tune) | 8.98E-03 | 8.98E-03 | 3.13E-02 |
|               | <b>Ours</b>     | 1.98E-02 | 1.46E-02 | 1.23E-01 |
| CIFAR10       | OE (tune)       | 3.73E-03 | 3.73E-03 | 1.34E-02 |
|               | EnergyOE (tune) | 9.57E-03 | 1.07E-02 | 6.44E-02 |
|               | <b>Ours</b>     | 7.64E-03 | 1.37E-02 | 6.50E-02 |
| Tiny ImageNet | OE (tune)       | 0.00E+00 | 4.71E-03 | 2.11E-02 |
|               | EnergyOE (tune) | 5.77E-03 | 1.00E-02 | 4.85E-02 |
|               | <b>Ours</b>     | 7.45E-03 | 9.57E-03 | 5.88E-02 |
| LSUN          | OE (tune)       | 0.00E+00 | 0.00E+00 | 1.83E-02 |
|               | EnergyOE (tune) | 9.43E-03 | 1.25E-02 | 5.28E-02 |
|               | <b>Ours</b>     | 8.98E-03 | 1.34E-02 | 6.08E-02 |
| Places365     | OE (tune)       | 1.42E-14 | 0.00E+00 | 1.26E-02 |
|               | EnergyOE (tune) | 5.00E-03 | 5.00E-03 | 1.67E-02 |
|               | <b>Ours</b>     | 5.77E-03 | 5.00E-03 | 2.21E-02 |
| Average       | OE (tune)       | 9.62E-04 | 1.60E-03 | 6.14E-03 |
|               | EnergyOE (tune) | 3.42E-03 | 5.56E-03 | 2.43E-02 |
|               | <b>Ours</b>     | 4.04E-03 | 3.97E-03 | 1.41E-02 |

## S.6. Experiment Results on synthetic OOD dataset

### S.6.1 Long-tailed Image Classification

#### ResNet18 model on CIFAR10-LT:

Table S.21. Synthetic OOD evaluation result on CIFAR10-LT using ResNet18 : OOD detection performance with AUROC,AP and FPR; (a): Mean over six random runs; (b): Std over six random runs(OE,OECC,EnergyOE,Ours).

| (a)        |                 |                |               |                  | (b)        |                 |                |               |                  |
|------------|-----------------|----------------|---------------|------------------|------------|-----------------|----------------|---------------|------------------|
| Dataset    | Method          | AUC $\uparrow$ | AP $\uparrow$ | FPR $\downarrow$ | Dataset    | Method          | AUC $\uparrow$ | AP $\uparrow$ | FPR $\downarrow$ |
| Gaussian   | OE (tune)       | 97.15          | 92.19         | 5.11             | Gaussian   | OE (tune)       | 1.46E-02       | 3.13E-02      | 5.25E-02         |
|            | OECC            | <b>99.80</b>   | <b>99.65</b>  | 0.50             |            | OECC            | 3.73E-03       | 4.71E-03      | 5.00E-03         |
|            | EnergyOE (tune) | 99.74          | 99.33         | 0.54             |            | EnergyOE (tune) | 6.87E-03       | 3.86E-02      | 1.77E-02         |
|            | <b>Ours</b>     | 99.76          | 99.16         | <b>0.49</b>      |            | <b>Ours</b>     | 7.45E-03       | 1.25E-02      | 3.73E-03         |
| Rademacher | OE (tune)       | <b>99.28</b>   | 98.24         | 1.57             | Rademacher | OE (tune)       | 3.73E-03       | 1.29E-02      | 1.37E-02         |
|            | OECC            | 99.03          | <b>98.36</b>  | 2.51             |            | OECC            | 3.73E-03       | 1.34E-02      | 1.25E-02         |
|            | EnergyOE (tune) | 99.13          | 97.16         | 1.51             |            | EnergyOE (tune) | 1.71E-02       | 4.73E-02      | 2.54E-02         |
|            | <b>Ours</b>     | 99.00          | 96.26         | <b>1.42</b>      |            | <b>Ours</b>     | 1.86E-02       | 6.37E-02      | 3.54E-02         |
| Blob       | OE (tune)       | 43.80          | 43.12         | 84.15            | Blob       | OE (tune)       | 1.16E-01       | 7.42E-02      | 1.88E-01         |
|            | OECC            | 59.18          | 52.12         | 73.19            |            | OECC            | 2.70E-01       | 1.60E-01      | 3.05E-01         |
|            | EnergyOE (tune) | 90.16          | 85.39         | 28.79            |            | EnergyOE (tune) | 6.57E-02       | 9.63E-02      | 3.64E-01         |
|            | <b>Ours</b>     | <b>93.18</b>   | <b>89.34</b>  | <b>22.20</b>     |            | <b>Ours</b>     | 1.14E-01       | 1.63E-01      | 3.56E-01         |
| Average    | OE (tune)       | 80.08          | 77.85         | 30.27            | Average    | OE (tune)       | 3.62E-02       | 2.10E-02      | 7.26E-02         |
|            | OECC            | 86.00          | 83.38         | 25.40            |            | OECC            | 9.00E-02       | 5.68E-02      | 1.02E-01         |
|            | EnergyOE (tune) | 96.34          | 93.96         | 10.28            |            | EnergyOE (tune) | 2.62E-02       | 5.10E-02      | 1.20E-01         |
|            | <b>Ours</b>     | <b>97.32</b>   | <b>94.92</b>  | <b>8.04</b>      |            | <b>Ours</b>     | 3.65E-02       | 5.26E-02      | 1.26E-01         |

#### ResNet18 model on CIFAR100-LT:

Table S.22. Synthetic OOD evaluation result on CIFAR100-LT using ResNet18 : OOD detection performance with AUROC,AP and FPR; (a): Mean over six random runs; (b): Std over six random runs(OE,OECC,EnergyOE,Ours).

| (a)        |                 |                |               |                  | (b)        |                 |                |               |                  |
|------------|-----------------|----------------|---------------|------------------|------------|-----------------|----------------|---------------|------------------|
| Dataset    | Method          | AUC $\uparrow$ | AP $\uparrow$ | FPR $\downarrow$ | Dataset    | Method          | AUC $\uparrow$ | AP $\uparrow$ | FPR $\downarrow$ |
| Gaussian   | OE (tune)       | 56.27          | 48.35         | 69.79            | Gaussian   | OE (tune)       | 2.05E-01       | 1.22E-01      | 2.16E-01         |
|            | OECC            | <b>95.59</b>   | 87.82         | <b>6.58</b>      |            | OECC            | 4.34E-02       | 1.16E-01      | 3.53E-02         |
|            | EnergyOE (tune) | 88.13          | 79.36         | 27.89            |            | EnergyOE (tune) | 1.59E-01       | 2.77E-01      | 2.54E-01         |
|            | <b>Ours</b>     | 94.56          | <b>88.32</b>  | 13.22            |            | <b>Ours</b>     | 1.10E-01       | 1.91E-01      | 2.09E-01         |
| Rademacher | OE (tune)       | 48.47          | 44.24         | 75.03            | Rademacher | OE (tune)       | 1.28E-01       | 6.03E-02      | 1.72E-01         |
|            | OECC            | <b>92.11</b>   | 80.92         | <b>11.78</b>     |            | OECC            | 2.62E-02       | 5.16E-02      | 5.21E-02         |
|            | EnergyOE (tune) | 83.43          | 71.56         | 32.76            |            | EnergyOE (tune) | 2.05E-01       | 2.77E-01      | 3.80E-01         |
|            | <b>Ours</b>     | 91.48          | <b>82.87</b>  | 18.42            |            | <b>Ours</b>     | 1.67E-01       | 2.48E-01      | 3.22E-01         |
| Blob       | OE (tune)       | 70.43          | 66.45         | 73.39            | Blob       | OE (tune)       | 9.75E-02       | 1.26E-01      | 2.06E-01         |
|            | OECC            | 95.42          | 90.91         | <b>12.25</b>     |            | OECC            | 2.31E-02       | 7.13E-02      | 1.53E-01         |
|            | EnergyOE (tune) | 88.48          | 85.37         | 36.28            |            | EnergyOE (tune) | 8.50E-02       | 8.30E-02      | 4.39E-01         |
|            | <b>Ours</b>     | <b>96.42</b>   | <b>94.92</b>  | 13.30            |            | <b>Ours</b>     | 5.88E-02       | 7.65E-02      | 3.79E-01         |
| Average    | OE (tune)       | 58.39          | 53.01         | 72.74            | Average    | OE (tune)       | 7.97E-02       | 6.57E-02      | 1.16E-01         |
|            | OECC            | <b>94.37</b>   | 86.55         | <b>10.20</b>     |            | OECC            | 2.17E-02       | 5.23E-02      | 6.18E-02         |
|            | EnergyOE (tune) | 86.68          | 78.76         | 32.31            |            | EnergyOE (tune) | 1.02E-01       | 1.68E-01      | 6.82E-02         |
|            | <b>Ours</b>     | 94.15          | <b>88.70</b>  | 14.98            |            | <b>Ours</b>     | 9.25E-02       | 1.43E-01      | 1.39E-01         |

## S.6.2 Image Classification

### ResNet18 model on CIFAR10:

Table S.23. Synthetic OOD evaluation result on CIFAR10 using ResNet18 : OOD detection performance with AUROC,AP and FPR; (a): Mean over six random runs; (b): Std over six random runs(OE,OECC,EnergyOE,Ours).

| (a)        |                 |                |               |                  | (b)        |                 |                |               |                  |
|------------|-----------------|----------------|---------------|------------------|------------|-----------------|----------------|---------------|------------------|
| Dataset    | Method          | AUC $\uparrow$ | AP $\uparrow$ | FPR $\downarrow$ | Dataset    | Method          | AUC $\uparrow$ | AP $\uparrow$ | FPR $\downarrow$ |
| Gaussian   | OE (tune)       | 99.74          | <b>99.28</b>  | 0.57             | Gaussian   | OE (tune)       | 0.00E+00       | 4.71E-03      | 0.00E+00         |
|            | OECC            | 99.43          | 98.20         | 0.80             |            | OECC            | 2.40E-01       | 1.02E+00      | 2.33E-01         |
|            | EnergyOE (tune) | 99.76          | 99.19         | 0.49             |            | EnergyOE (tune) | 5.77E-03       | 1.77E-02      | 9.57E-03         |
|            | <b>Ours</b>     | <b>99.82</b>   | 99.20         | <b>0.28</b>      |            | <b>Ours</b>     | 3.73E-03       | 1.80E-02      | 7.45E-03         |
| Rademacher | OE (tune)       | 99.63          | 98.91         | 0.80             | Rademacher | OE (tune)       | 4.71E-03       | 7.45E-03      | 1.21E-02         |
|            | OECC            | 99.56          | 98.47         | 0.57             |            | OECC            | 2.79E-01       | 1.17E+00      | 2.90E-01         |
|            | EnergyOE (tune) | 99.59          | 98.57         | 0.72             |            | EnergyOE (tune) | 1.61E-02       | 6.67E-02      | 3.16E-02         |
|            | <b>Ours</b>     | <b>99.78</b>   | <b>98.93</b>  | <b>0.33</b>      |            | <b>Ours</b>     | 4.71E-03       | 1.70E-02      | 8.16E-03         |
| Blob       | OE (tune)       | 97.71          | 96.71         | 8.84             | Blob       | OE (tune)       | 2.75E-02       | 3.04E-02      | 2.49E-01         |
|            | OECC            | 99.40          | 98.69         | 1.50             |            | OECC            | 1.11E-01       | 4.37E-01      | 8.98E-02         |
|            | EnergyOE (tune) | 99.42          | 99.24         | 2.10             |            | EnergyOE (tune) | 1.57E-02       | 1.57E-02      | 6.47E-02         |
|            | <b>Ours</b>     | <b>99.63</b>   | <b>99.47</b>  | <b>1.44</b>      |            | <b>Ours</b>     | 1.80E-02       | 1.73E-02      | 5.30E-02         |
| Average    | OE (tune)       | 99.03          | 98.30         | 3.41             | Average    | OE (tune)       | 8.61E-03       | 9.57E-03      | 8.08E-02         |
|            | OECC            | 99.46          | 98.45         | 0.96             |            | OECC            | 1.95E-01       | 8.50E-01      | 1.96E-01         |
|            | EnergyOE (tune) | 99.59          | 99.00         | 1.10             |            | EnergyOE (tune) | 1.10E-02       | 3.07E-02      | 2.94E-02         |
|            | <b>Ours</b>     | <b>99.74</b>   | <b>99.20</b>  | <b>0.69</b>      |            | <b>Ours</b>     | 6.31E-03       | 1.23E-02      | 1.91E-02         |

### ResNet18 model on CIFAR100:

Table S.24. Synthetic OOD evaluation result on CIFAR100 using ResNet18 : OOD detection performance with AUROC,AP and FPR; (a): Mean over six random runs; (b): Std over six random runs(OE,OECC,EnergyOE,Ours).

| (a)        |                 |                |               |                  | (b)        |                 |                |               |                  |
|------------|-----------------|----------------|---------------|------------------|------------|-----------------|----------------|---------------|------------------|
| Dataset    | Method          | AUC $\uparrow$ | AP $\uparrow$ | FPR $\downarrow$ | Dataset    | Method          | AUC $\uparrow$ | AP $\uparrow$ | FPR $\downarrow$ |
| Gaussian   | OE (tune)       | 81.41          | 66.42         | 25.99            | Gaussian   | OE (tune)       | 3.27E-02       | 3.44E-02      | 1.18E-01         |
|            | OECC            | <b>99.31</b>   | <b>98.59</b>  | <b>1.82</b>      |            | OECC            | 5.06E-02       | 1.46E-01      | 1.09E-01         |
|            | EnergyOE (tune) | 92.66          | 83.22         | 12.77            |            | EnergyOE (tune) | 1.17E-01       | 2.20E-01      | 1.27E-01         |
|            | <b>Ours</b>     | 93.92          | 85.64         | 11.01            |            | <b>Ours</b>     | 7.08E-02       | 1.42E-01      | 1.08E-01         |
| Rademacher | OE (tune)       | 99.87          | 99.72         | 0.33             | Rademacher | OE (tune)       | 0.00E+00       | 3.73E-03      | 4.71E-03         |
|            | OECC            | 96.44          | 89.06         | 4.58             |            | OECC            | 1.35E-01       | 3.89E-01      | 1.14E-01         |
|            | EnergyOE (tune) | <b>99.91</b>   | <b>99.83</b>  | <b>0.21</b>      |            | EnergyOE (tune) | 3.73E-03       | 9.43E-03      | 6.87E-03         |
|            | <b>Ours</b>     | <b>99.91</b>   | <b>99.83</b>  | <b>0.21</b>      |            | <b>Ours</b>     | 4.71E-03       | 6.87E-03      | 7.64E-03         |
| Blob       | OE (tune)       | 98.31          | 97.81         | 6.52             | Blob       | OE (tune)       | 2.92E-02       | 3.98E-02      | 1.55E-01         |
|            | OECC            | 94.26          | 89.72         | 14.67            |            | OECC            | 1.99E-01       | 3.20E-01      | 6.57E-01         |
|            | EnergyOE (tune) | 98.56          | 98.07         | 6.01             |            | EnergyOE (tune) | 3.40E-02       | 3.98E-02      | 1.78E-01         |
|            | <b>Ours</b>     | <b>98.75</b>   | <b>98.34</b>  | <b>5.24</b>      |            | <b>Ours</b>     | 1.57E-02       | 2.27E-02      | 8.03E-02         |
| Average    | OE (tune)       | 93.20          | 87.98         | 10.94            | Average    | OE (tune)       | 1.56E-02       | 2.03E-02      | 6.29E-02         |
|            | OECC            | 96.67          | 92.46         | 7.02             |            | OECC            | 8.80E-02       | 1.79E-01      | 2.49E-01         |
|            | EnergyOE (tune) | 97.04          | 93.71         | 6.33             |            | EnergyOE (tune) | 4.55E-02       | 8.38E-02      | 8.44E-02         |
|            | <b>Ours</b>     | <b>97.53</b>   | <b>94.60</b>  | <b>5.49</b>      |            | <b>Ours</b>     | 2.22E-02       | 4.53E-02      | 4.59E-02         |
